# Supplementary material for: GenBank is a reliable resource for 21st century biodiversity research
Source: PubMed Central journal article supplement (PMC6842603; doi:10.1073/pnas.1911714116), 2019-10-21
Supplement: pnas.1911714116.sapp.pdf [file pnas.1911714116.sapp.pdf]

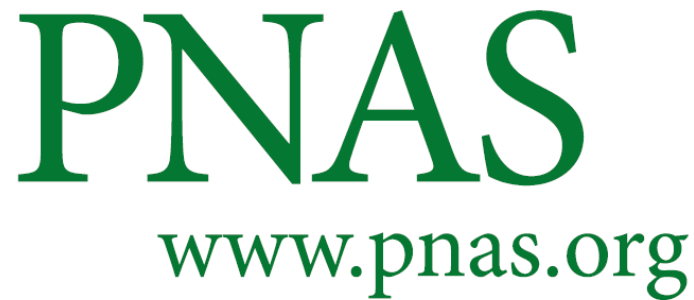

## Supplementary Information for

GenBank is a reliable resource for 21<sup>st</sup> century biodiversity research

Matthieu Leray  
Nancy Knowlton  
Shian-Lei Ho  
Bryan N. Nguyen  
Ryuji J. Machida

### Corresponding Authors

Ryuji J. Machida; Biodiversity Research Centre, Academia Sinica, Taipei, 115-29, Taiwan;  
ryujimachida@gmail.com; Tel +886-2-2787-1585; Fax +886-2-2785-8059  
Nancy Knowlton; National Museum of Natural History, Smithsonian, Washington, DC,  
USA; [knowlton@si.edu](mailto:knowlton@si.edu); Tel +1-202-213 4587

### **This PDF file includes:**

Figs. S1 to S6  
Tables S1 to S2

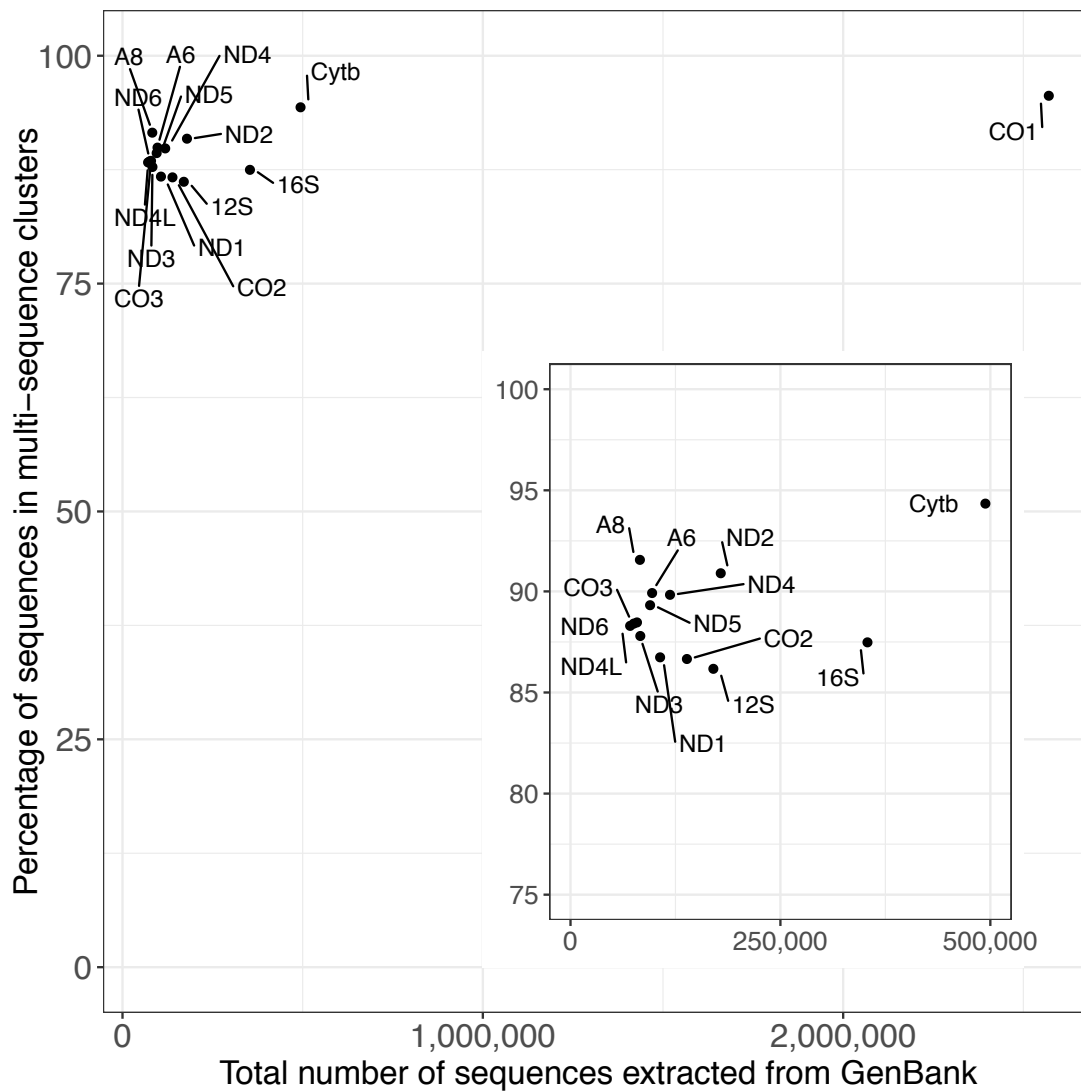

**Fig. S1.** Proportion of metazoan sequences that clustered at 97% similarity threshold as a function of the total number of sequences present in the GenBank BLAST nucleotide database.

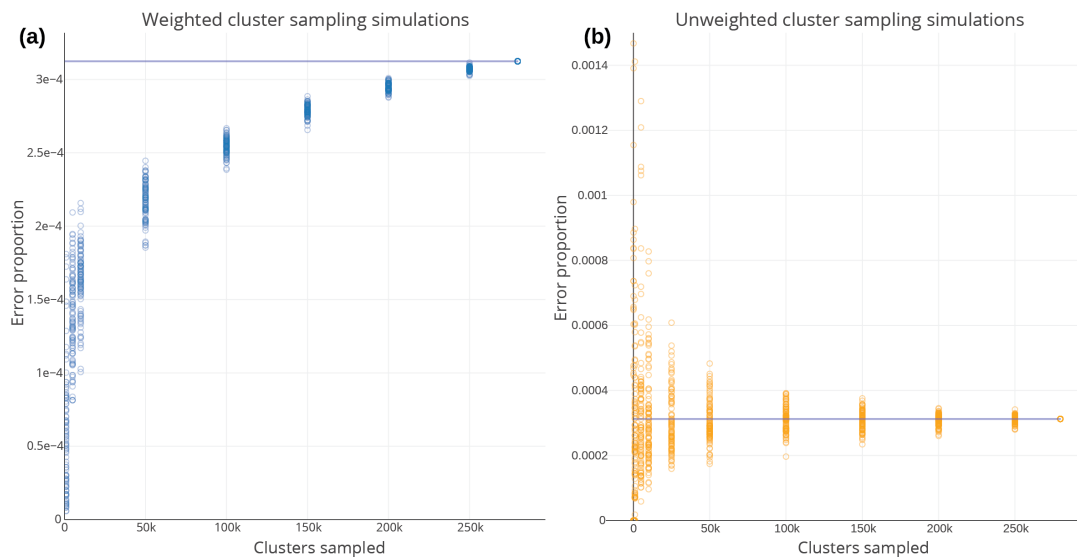

**Fig. S2.** Order-level error proportion estimates resulting from random weighted (a) and unweighted (b) subsampling of the data for 100 replicates at increasing sampling depths. The horizontal blue line represents the total order-level error proportion of the entire dataset. Subsampling clusters, weighting by cluster size, is equivalent to randomly sampling sequences for their corresponding clusters.

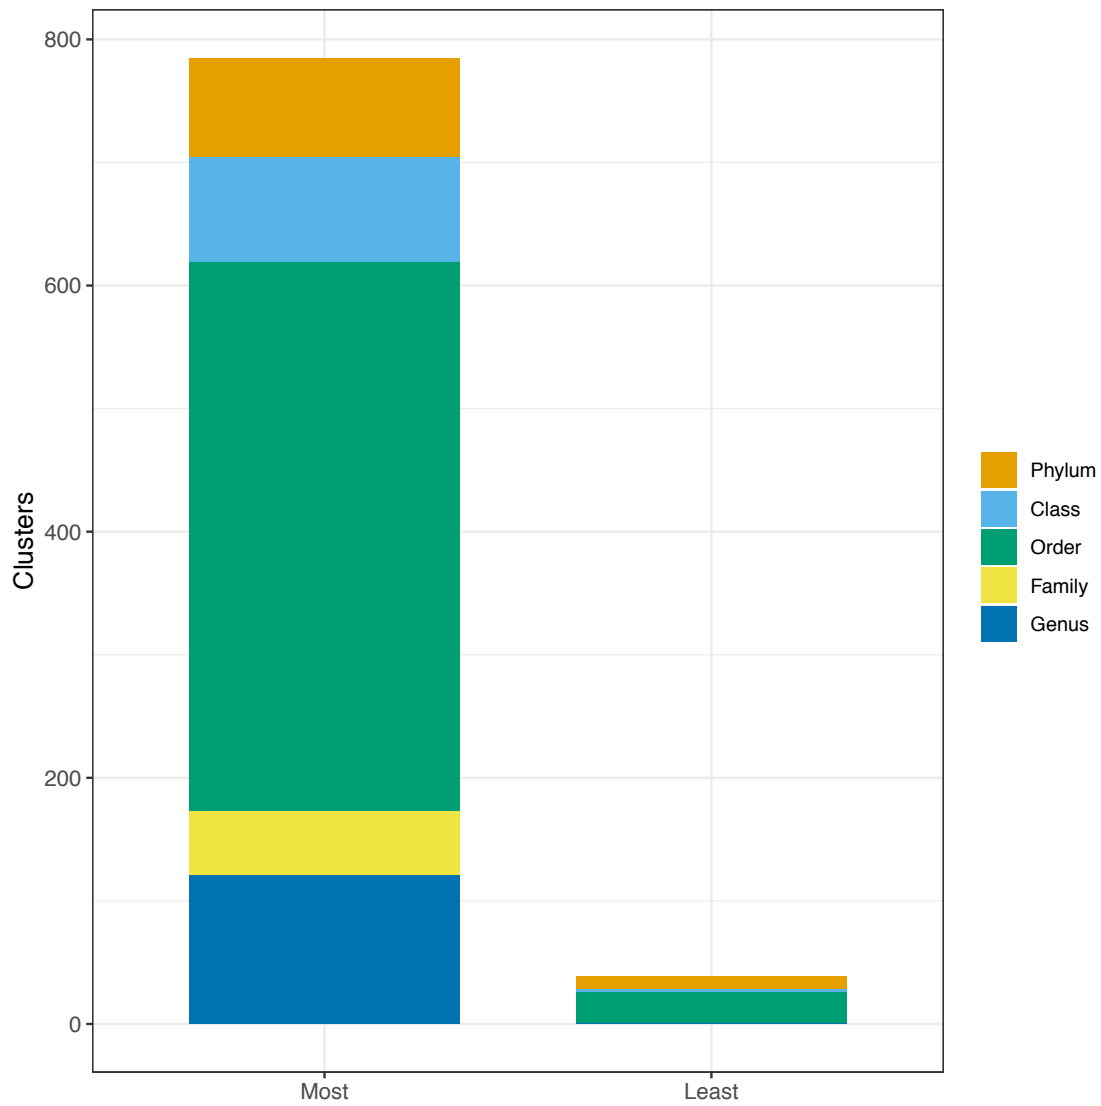

**Fig. S3.** Number of clusters for which the most or least common entries had correct taxonomic annotations. Clusters with equal number of entries belonging to the most and least common sequences were disregarded in this estimation.

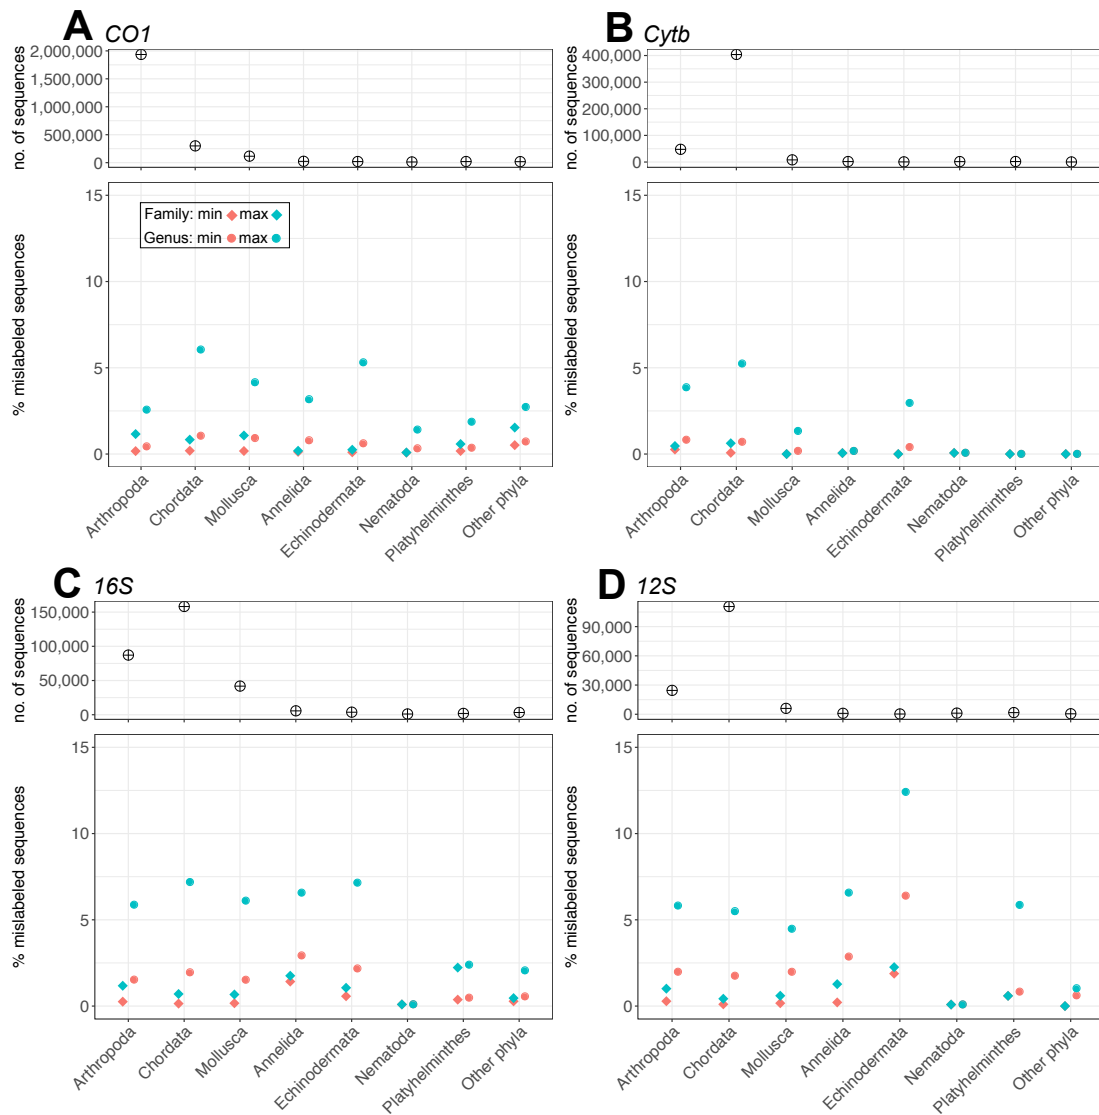

**Fig. S4.** Estimated percentage of mislabeled sequences at the genus and family levels for *CO1* (A), *Cytb* (B), *16S* (C) and *12S* (D) across major metazoan phyla. We excluded phyla Porifera and Cnidaria clusters with their higher error estimates likely caused by slower rates of molecular evolution to facilitate visualization of lower error rates in the other groups. The category “Other phyla” includes sequences of Acanthocephala, Brachiopoda, Bryozoa, Chaetognatha, Ctenophora, Cyclophora, Entoprocta, Gastrotricha, Hemichordata, Kinorhyncha, Nematomorpha, Nemertea, Onychophora, Placozoa, Priapulida, Rhombozoa, Rotifera, Tardigrada and Xenacoelomorpha.

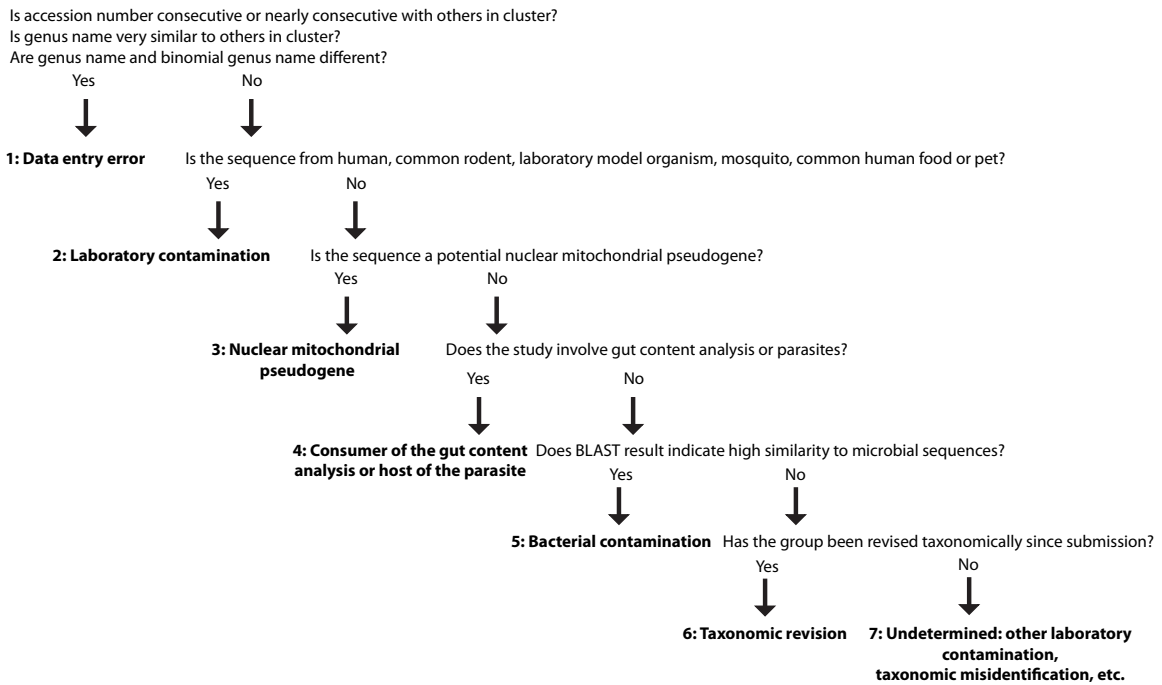

**Fig. S5.** Flowchart for determining causes of multiple taxa (genus, family, order, class, phylum) within clusters. For each potentially mislabeled sequence the questions shown were answered in sequence to determine the most likely reason.

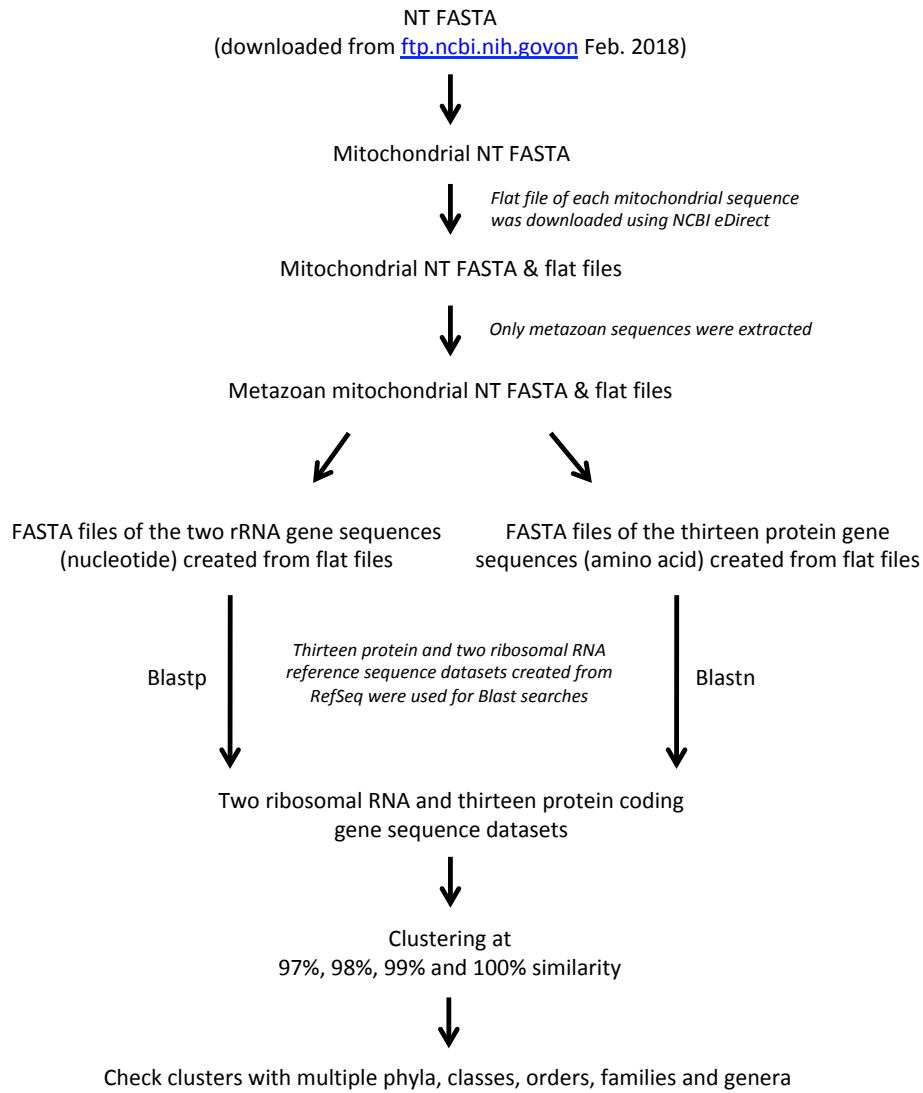

**Fig. S6.** Flowchart describing the procedure used to classify mitochondrial gene sequences downloaded from GenBank.

| Genes        | Total number of clusters | Number of non-solitary clusters | Clusters with multiple phyla |      | Clusters with multiple classes |      | Clusters with multiple orders |      | Clusters with multiple families |      | Clusters with multiple genera |      | Total clusters with multiple taxa |      |
|--------------|--------------------------|---------------------------------|------------------------------|------|--------------------------------|------|-------------------------------|------|---------------------------------|------|-------------------------------|------|-----------------------------------|------|
|              | Count                    | Count                           | Count                        | %    | Count                          | %    | Count                         | %    | Count                           | %    | Count                         | %    | Count                             | %    |
| <i>12S</i>   | 38287                    | 14760                           | 1                            | 0.01 | 2                              | 0.01 | 49                            | 0.33 | 132                             | 0.89 | 1011                          | 6.85 | 1195                              | 8.10 |
| <i>16S</i>   | 77890                    | 33615                           | 16                           | 0.05 | 10                             | 0.03 | 80                            | 0.24 | 354                             | 1.05 | 2059                          | 6.13 | 2519                              | 7.49 |
| <i>A6</i>    | 13895                    | 4098                            | 0                            | 0.00 | 0                              | 0.00 | 13                            | 0.32 | 20                              | 0.49 | 170                           | 4.15 | 203                               | 4.95 |
| <i>A8</i>    | 10047                    | 3070                            | 0                            | 0.00 | 0                              | 0.00 | 10                            | 0.33 | 22                              | 0.72 | 204                           | 6.64 | 236                               | 7.69 |
| <i>Cytb</i>  | 56805                    | 28854                           | 18                           | 0.06 | 16                             | 0.06 | 78                            | 0.27 | 145                             | 0.50 | 919                           | 3.19 | 1176                              | 4.08 |
| <i>CO1</i>   | 261345                   | 148475                          | 71                           | 0.05 | 78                             | 0.05 | 381                           | 0.26 | 1409                            | 0.95 | 3852                          | 2.59 | 5791                              | 3.90 |
| <i>CO2</i>   | 26846                    | 8345                            | 1                            | 0.01 | 2                              | 0.02 | 12                            | 0.14 | 51                              | 0.61 | 383                           | 4.59 | 449                               | 5.38 |
| <i>CO3</i>   | 11908                    | 2778                            | 0                            | 0.00 | 0                              | 0.00 | 10                            | 0.36 | 35                              | 1.26 | 147                           | 5.29 | 192                               | 6.91 |
| <i>ND1</i>   | 19714                    | 5561                            | 0                            | 0.00 | 1                              | 0.02 | 7                             | 0.13 | 34                              | 0.61 | 192                           | 3.45 | 234                               | 4.21 |
| <i>ND2</i>   | 28331                    | 12045                           | 0                            | 0.00 | 1                              | 0.01 | 14                            | 0.12 | 43                              | 0.36 | 328                           | 2.72 | 386                               | 3.20 |
| <i>ND3</i>   | 13754                    | 3608                            | 0                            | 0.00 | 0                              | 0.00 | 7                             | 0.19 | 25                              | 0.69 | 158                           | 4.38 | 190                               | 5.27 |
| <i>ND4</i>   | 18261                    | 6209                            | 1                            | 0.02 | 0                              | 0.00 | 7                             | 0.11 | 24                              | 0.39 | 189                           | 3.04 | 221                               | 3.56 |
| <i>ND4L</i>  | 10660                    | 2348                            | 0                            | 0.00 | 0                              | 0.00 | 8                             | 0.34 | 29                              | 1.24 | 152                           | 6.47 | 189                               | 8.05 |
| <i>ND5</i>   | 13814                    | 3688                            | 0                            | 0.00 | 0                              | 0.00 | 5                             | 0.14 | 19                              | 0.52 | 178                           | 4.83 | 202                               | 5.48 |
| <i>ND6</i>   | 11176                    | 2445                            | 0                            | 0.00 | 1                              | 0.04 | 7                             | 0.29 | 22                              | 0.90 | 132                           | 5.40 | 162                               | 6.63 |
| <b>Total</b> | <b>612733</b>            | <b>279899</b>                   | <b>108</b>                   |      | <b>111</b>                     |      | <b>688</b>                    |      | <b>2364</b>                     |      | <b>10074</b>                  |      | <b>13345</b>                      |      |

**Table S1.** Observed number of clusters, non-solitary clusters, clusters with multiple phyla, classes, orders, families, and genera at 97% clustering. Percentages are calculated relative to the total number of non-solitary clusters. Clusters with multiple taxonomic groups were independently counted at each taxonomic level (i.e. multiple class counts were those in addition to those occurring via multiple phyla counts).



|                                |                       | <i>12S</i> | <i>16S</i> | <i>A6</i> | <i>A8</i> | <i>Cytb</i> | <i>CO1</i> | <i>CO2</i> | <i>CO3</i> | <i>ND1</i> | <i>ND2</i> | <i>ND3</i> | <i>ND4</i> | <i>ND4L</i> | <i>ND5</i> | <i>ND6</i> | Total no. seqs | % seqs |
|--------------------------------|-----------------------|------------|------------|-----------|-----------|-------------|------------|------------|------------|------------|------------|------------|------------|-------------|------------|------------|----------------|--------|
| Phylum, class and order levels | 1: Data entry error   | 8          | 6          | 0         | 0         | 16          | 88         | 1          | 0          | 1          | 0          | 0          | 0          | 0           | 1          | 0          | 121            | 8.4    |
|                                | 2: Laboratory cont.   | 6          | 95         | 1         | 0         | 45          | 75         | 11         | 1          | 0          | 0          | 0          | 0          | 0           | 1          | 0          | 235            | 16.3   |
|                                | 3: Pseudogene         | 4          | 1          | 3         | 3         | 2           | 2          | 0          | 0          | 0          | 0          | 0          | 0          | 1           | 0          | 0          | 16             | 1.1    |
|                                | 4: Consumer or host   | 0          | 3          | 0         | 0         | 42          | 1          | 0          | 0          | 0          | 0          | 0          | 0          | 0           | 0          | 0          | 46             | 3.2    |
|                                | 5: Bacterial cont.    | 0          | 0          | 0         | 0         | 0           | 2          | 0          | 0          | 0          | 0          | 0          | 0          | 0           | 0          | 0          | 2              | 0.1    |
|                                | 6: Taxonomic revision | 0          | 0          | 0         | 0         | 0           | 0          | 0          | 0          | 0          | 0          | 0          | 0          | 0           | 0          | 0          | 0              | 0.0    |
|                                | 7: Undetermined       | 44         | 103        | 9         | 55        | 124         | 622        | 16         | 8          | 3          | 10         | 5          | 10         | 3           | 2          | 5          | 1019           | 70.8   |
|                                | Total                 | 62         | 208        | 13        | 58        | 229         | 790        | 28         | 9          | 4          | 10         | 5          | 10         | 4           | 4          | 5          | 1439           | 100    |
|                                |                       | <i>12S</i> | <i>16S</i> | <i>A6</i> | <i>A8</i> | <i>Cytb</i> | <i>CO1</i> | <i>CO2</i> | <i>CO3</i> | <i>ND1</i> | <i>ND2</i> | <i>ND3</i> | <i>ND4</i> | <i>ND4L</i> | <i>ND5</i> | <i>ND6</i> | Total no. seqs | % seqs |
| Family and genus levels        | 1: Data entry error   | 2          | 0          | 0         | 0         | 4           | 16         | 0          | 0          | 0          | 0          | 0          | 0          | 0           | 0          | 0          | 22             | 2.8    |
|                                | 2: Laboratory cont.   | 2          | 1          | 0         | 0         | 20          | 10         | 0          | 0          | 0          | 0          | 0          | 1          | 0           | 1          | 0          | 35             | 4.5    |
|                                | 3: Pseudogene         | 0          | 0          | 0         | 0         | 0           | 0          | 1          | 0          | 0          | 0          | 0          | 0          | 0           | 0          | 0          | 1              | 0.1    |
|                                | 4: Consumer or host   | 0          | 0          | 0         | 0         | 0           | 0          | 0          | 0          | 0          | 0          | 0          | 0          | 0           | 0          | 0          | 0              | 0.0    |
|                                | 5: Bacterial cont.    | 0          | 0          | 0         | 0         | 0           | 0          | 0          | 0          | 0          | 0          | 0          | 0          | 0           | 0          | 0          | 0              | 0.0    |
|                                | 6: Taxonomic revision | 0          | 0          | 0         | 0         | 421         | 9          | 1          | 0          | 0          | 0          | 0          | 0          | 0           | 0          | 0          | 431            | 55.0   |
|                                | 7: Undetermined       | 2          | 15         | 1         | 0         | 72          | 189        | 7          | 0          | 0          | 3          | 2          | 0          | 0           | 3          | 0          | 294            | 37.5   |
|                                | Total                 | 6          | 16         | 1         | 0         | 517         | 224        | 9          | 0          | 0          | 3          | 2          | 1          | 0           | 4          | 0          | 783            | 100    |

**Table S2.** Potential causes of sequence mislabeling at the phylum, class, order, family and genus levels for metazoan sequences belonging to 15 mitochondrial encoded genes. Only clusters where mislabeled sequences could be unequivocally identified were examined. Moreover, we only examined clusters with multiple families and genera when they contained at least 100 sequences. (cont. = contamination)
